# Supplementary material for: Doping of charge-transfer molecules in cocrystals for the design of materials with novel piezo-activated luminescence
Source: Royal Society of Chemistry journal article supplement (doi:10.1039/d2sc06315h), 2023-01-01
Supplement: d2sc06315h1.pdf [file d2sc06315h1.pdf]

## Supplementary Information

### **Doping of charge-transfer molecules in cocrystals for the design of materials with novel piezo-activated luminescence**

Xiu Yin,<sup>1</sup> Chunguang Zhai,<sup>1</sup> Shuhe Hu,<sup>1</sup> Lei Yue,<sup>1</sup> Tongge Xu,<sup>1</sup> Zhen Yao,<sup>1</sup>  
Quanjun Li,<sup>1</sup> Ran Liu,<sup>1</sup> Mingguang Yao,<sup>\*1</sup> Bertil Sundqvist,<sup>2</sup> Bingbing Liu,<sup>1</sup>

<sup>1</sup>State Key Laboratory of Superhard Materials, College of Physics, Jilin University,  
Changchun 130012, China

<sup>2</sup>Department of Physics, Umeå University, SE-90187 Umeå, Sweden

## Table of Content

### Supplementary Figures

**Fig. S1.** SEM image and the corresponding EDS mappings of PTCs:THT.

**Fig. S2.** The XRD pattern of PTCs:THT and PTCs, the sketch map for molecular packing of PTCs:THT.

**Fig. S3.** The luminescence spectra of PTCs and PTCs:THT at different pressures and the CIE chromaticity diagram of PTCs:THT.

**Fig. S4.** The sketch map for molecular packing and QM/MM model of PTC-THT.

**Fig. S5.** The plotted curves for the change of parameters (characterizing molecular configurations) for PTC-THT as pressure increases.

**Fig. S6.** The calculated luminescence spectra of PTC-THP and PTC-THF at different pressures.

**Fig. S7.** The changes of parameter for describing molecular configurations of PTC-THT, PTC-THP and PTC-THF in the range from ambient pressure to the pressure where the corresponding luminescence gets the strongest.

**Fig. S8.** The calculated Bader Charge of PTC-THP and PTC-THF at high pressures.

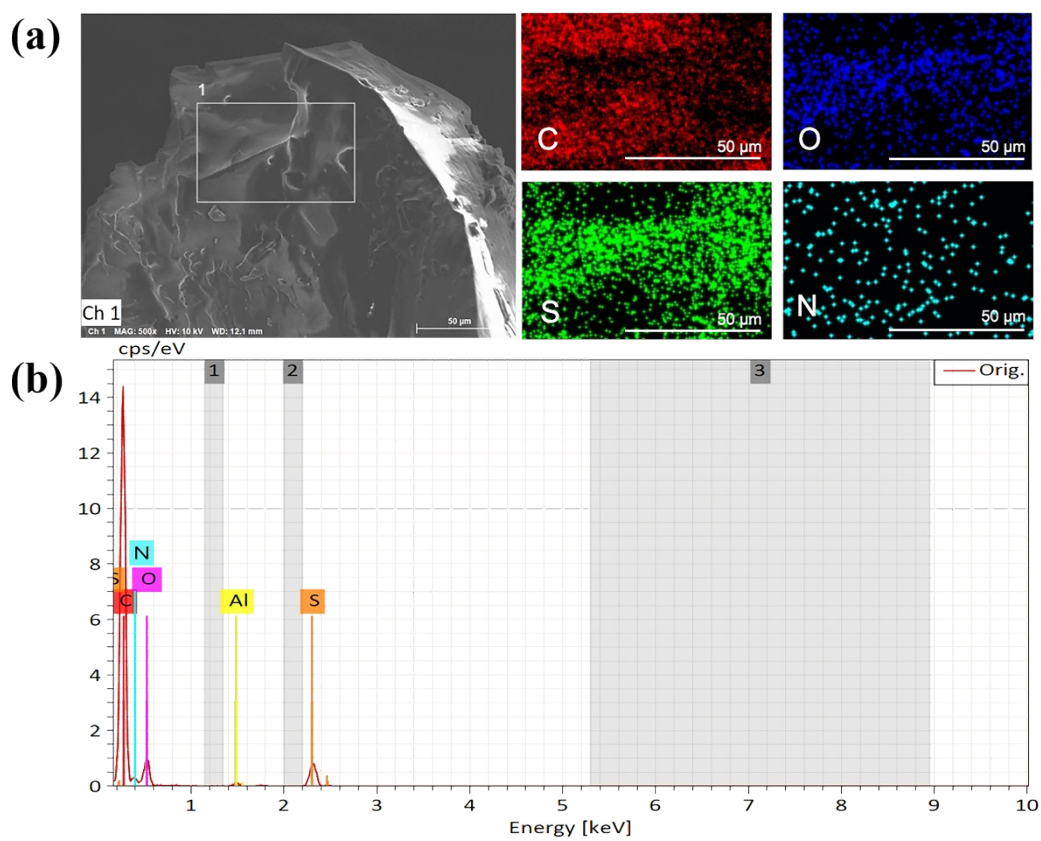

**Fig. S1.** (a) Scanning electron microscope (SEM) image and the corresponding EDS mappings of the gray box area for PTCs:THT; (b) The EDS spectra recorded from the gray box area.

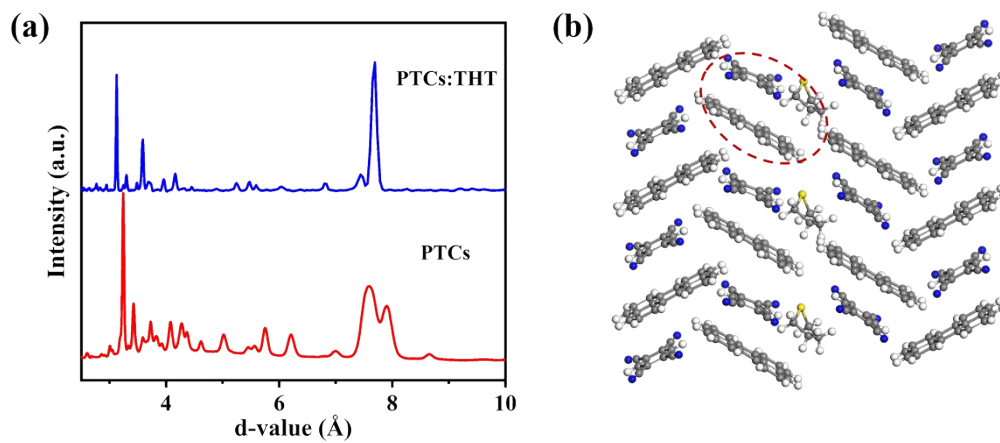

**Fig. S2.** (a) The XRD patterns of PTCs:THT and PTCs; (b) The sketch map for the molecular packing of PTCs:THT.

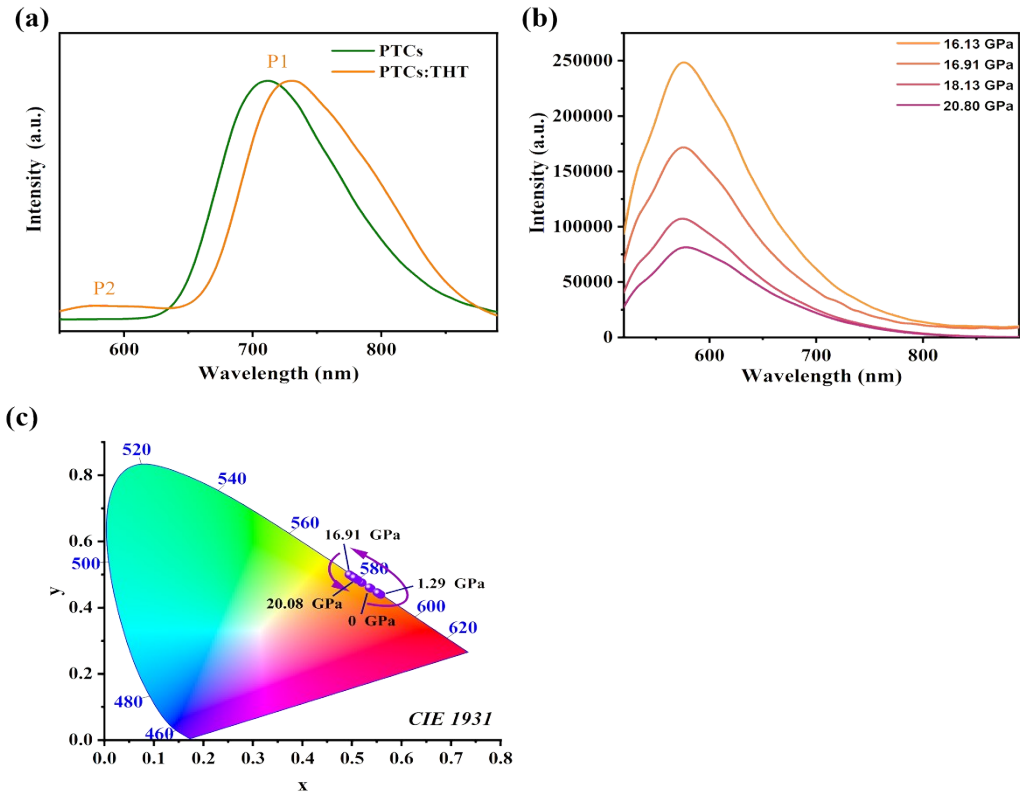

**Fig. S3.** (a) Luminescence spectra of PTCs and PTCs:THT at ambient pressure; (b) Luminescence spectra of PTCs:THT at pressures above 16 GPa; (c) CIE chromaticity diagram of PTCs:THT.

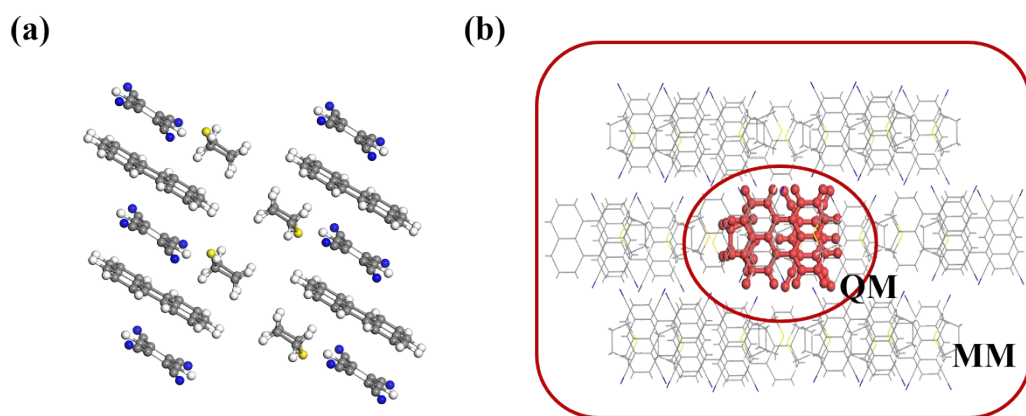

**Fig. S4.** The sketch map for molecular packing (a) and QM/MM model (b) of PTC-THT.

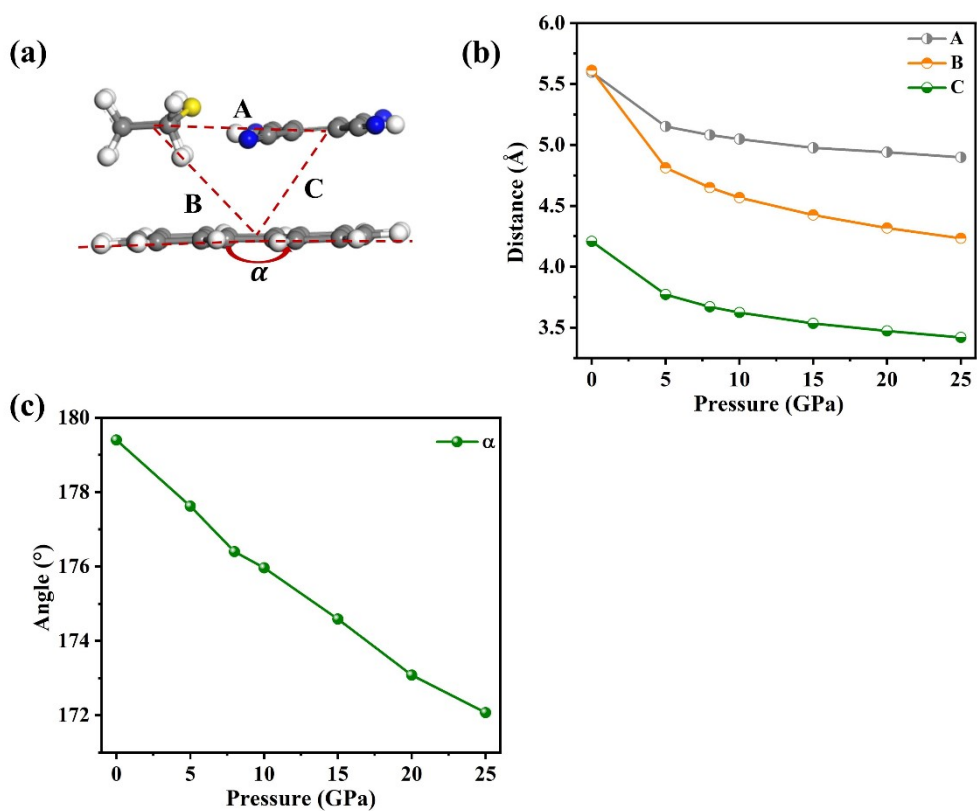

**Fig. S5.** (a) The definition of parameters A, B, C and  $\alpha$  for describing molecular configurations of PTC-THT (parameters A, B and C represent the distances indicated by the dashed lines, while angle  $\alpha$  represents the degree of distortion of perylene); the plotted curves for the change of (b) A, B, C and (c) angle  $\alpha$  for PTC-THT as pressure increases.

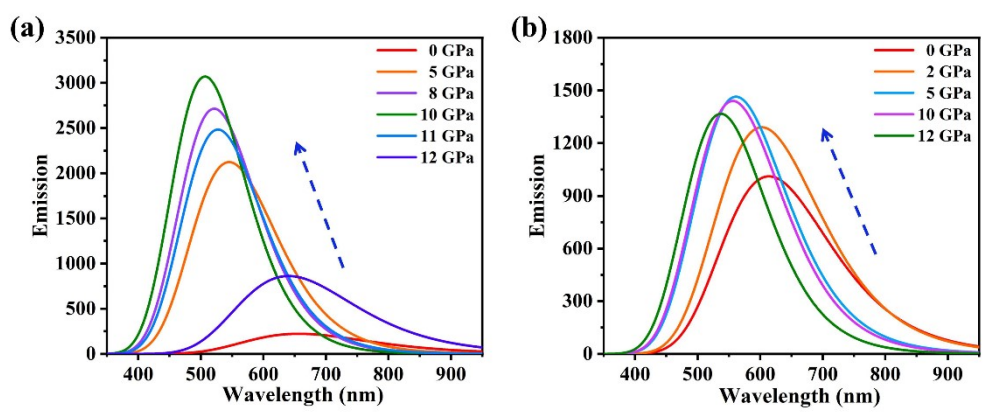

**Fig. S6.** The calculated luminescence spectra of (a) PTC-THP and (b) PTC-THF at different pressures.



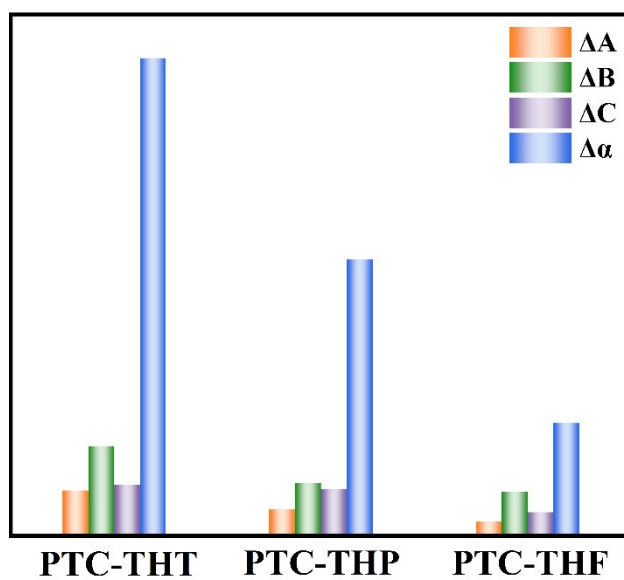

**Fig. S7.** The changes of A, B, C and  $\alpha$  (defined in Fig. S5) for describing molecular configurations of PTC-THT, PTC-THP and PTC-THF in the range from ambient pressure to the pressure where the corresponding luminescence gets the strongest.

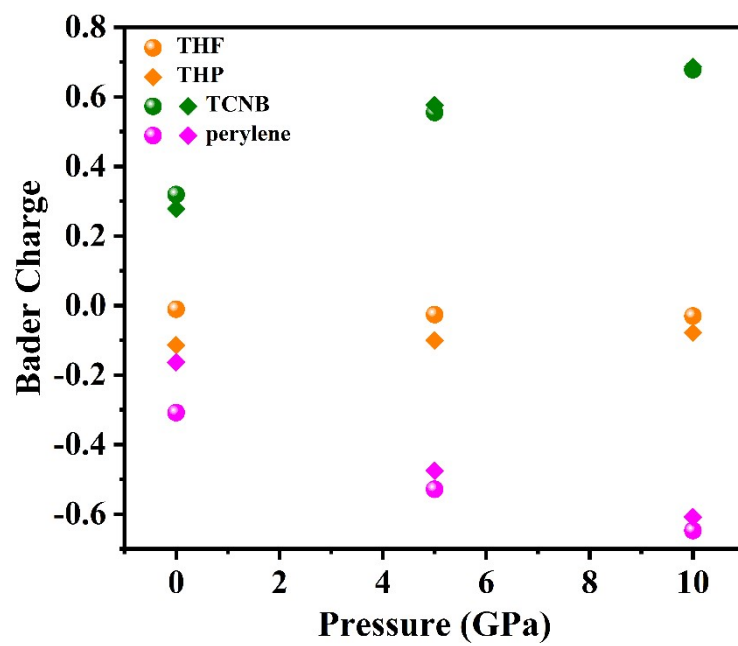

**Fig. S8.** The calculated Bader Charge of PTC-THP and PTC-THF at high pressures.
